# Supplementary material for: Synergistic effect of nanosheet-array-like NiFe-LDH and reduced graphene oxide modified Ni foam for greatly enhanced oxygen evolution reaction and hydrogen evolution reaction
Source: Royal Society of Chemistry journal article supplement (doi:10.1039/d2ma00370h), 2022-01-01
Supplement: d2ma00370h1.pdf [file d2ma00370h1.pdf]

# **Synergistic effect of nanosheet array-like NiFe-LDH and reduced graphene oxide modified Ni foam for greatly enhanced oxygen evolution reaction and hydrogen evolution reaction**

Kun Wang, Jiawei Guo, Hui Zhang\*

State Key Laboratory of Chemical Resource Engineering, Beijing University of Chemical  
Technology, Beijing 100029, China.

\*Correspondence should be addressed to Hui Zhang.

E-mail: zhanghui@buct.edu.cn, huizhang67@gst21.com

Tel.: +8610 64425872;

Fax: +8610 64425385;

Number of pages: **22**

Number of figures: **9**

Number of tables: **7**

## **Table of Contents**

|                             |                        |
|-----------------------------|------------------------|
| Experimental.....           | Pages S2 to Pages S6   |
| Figure S1 to Figure S9..... | Pages S7 to Pages S13  |
| Table S1 to Table S7.....   | Pages S14 to Pages S19 |
| References.....             | Pages S20 to Pages S21 |

## Experimental

### 1. Chemicals and materials

Natural graphite powder (325 mesh, >99.5%) was bought from Qingdao Huatai Lubrication and Sealing Technology Co., Ltd.  $\text{Ni}(\text{NO}_3)_2 \cdot 6\text{H}_2\text{O}$ ,  $\text{Fe}(\text{NO}_3)_2 \cdot 9\text{H}_2\text{O}$ ,  $\text{RuO}_2$  and 20% Pt/C were obtained from Aladdin. Citric acid ( $\text{C}_6\text{H}_8\text{O}_7 \cdot 6\text{H}_2\text{O}$ ) was purchased from Beijing Chemical Works (China). Acetone ( $\text{C}_3\text{H}_6\text{O}$ ,  $\geq 99.9\%$ ) and Ethanol ( $\text{C}_2\text{H}_5\text{OH}$ ,  $\geq 99.9\%$ ) were purchased from Thermo Fisher Scientific, and nickel foam was purchased from Saibo Company. All reagents can be used without further purification. Throughout the experiment, the resistivity of the deionized water was greater than  $18.25 \text{ M}\Omega \text{ cm}$  ( $25^\circ \text{C}$ ).

### 2. Synthesis

#### 2.1 Synthesis of rGO/NF

Using natural flake graphite as raw material, the modified Hummers method is used to prepare GO sol[1] and the details followed our previous work[2-4]. 5.37 mL (60 mg) GO sol (concentration:  $11.16 \text{ mg/mL}$ ,  $V = 60/11.16 = 5.37 \text{ mL}$ , excess) was placed in 60 mL deionized water, ultrasonicated for 20 min, and then 30 mg of citric acid (CA) was added for further ultrasonication for 10 min to obtain the CA-GO suspension. The obtained CA-GO suspension was placed into a 100 mL autoclave with two pieces of clean nickel foam (abbreviated as NF, 95% purity, cut to  $3 \text{ cm} \times 5 \text{ cm}$  size, then ultrasonically clean NF with acetone and  $3 \text{ mol L}^{-1}$  concentrated HCl for 15 min to remove oxides on the surface, followed by ultrasonically cleaning with deionized water until the  $\text{pH} \sim 7$ , then continue ultrasonically cleaning with anhydrous ethanol for 5 min to ensure that the NF surface is well cleaned, and finally vacuum dried at  $80^\circ \text{C}$  for 2 h) jammed into the autoclave with a longer edge of 5 cm and sealed, kept

at 120°C for 5 h. Until the autoclave cooled off naturally, followed repeatedly rinsed with deionized water to wash away the rGO attached on the surface and the pores of the NF skeleton, and freeze-dried to obtain rGO/NF.

## 2.2 Synthesis of Ni<sub>x</sub>Fe<sub>1-x</sub>-LDH/rGO/NF (x=3, 2, 1) composites

NiFe-LDH were prepared on rGO/NF by a simple green hydrothermal method. 0.29 g Ni(NO<sub>3</sub>)<sub>2</sub>·6H<sub>2</sub>O (1 mmol), 0.4 g Fe(NO<sub>3</sub>)<sub>3</sub>·9H<sub>2</sub>O (1 mmol) and 0.6 g CO(NH<sub>2</sub>)<sub>2</sub> (10 mmol) were dissolved in 80 mL deionized water to form a clear solution (Ni:Fe = 1:1). Then the above solution was transferred to a 100 mL autoclave with a piece of as-prepared rGO/NF tilted on the inner wall of the autoclave and sealed. It was kept at 120°C for 12 h, and naturally cooled to room temperature after the reaction. Subsequently, the composites were washed with distilled water and ethanol by sonication for 5 min and vacuum freeze-drying for 6 h, the obtained composite was named as Ni<sub>1</sub>Fe<sub>1</sub>-LDH/rGO/NF. Ni<sub>3</sub>Fe<sub>1</sub>-LDH/rGO/NF, Ni<sub>2</sub>Fe<sub>1</sub>-LDH/rGO/NF, control samples of Ni<sub>2</sub>Fe<sub>1</sub>-LDH/NF and Ni<sub>2</sub>Fe<sub>1</sub>-LDH were prepared by the similar method without changing the total content (2 mmol).

## 2.3 Preparation of RuO<sub>2</sub> and 20% Pt/C electrodes.

RuO<sub>2</sub> (50 mg) was dispersed in a 1 mL mixed solution (770 μL water, 30 μL 5 wt % Nafion solution, and 200 μL ethanol), followed by sonication to obtain a catalyst ink. The catalyst ink (113 μL) was then dropcast on the surface of Ni foam (1 cm × 1 cm), which was dried at 80°C for 4 h. Pt/C electrode were prepared in a similar fashion. The catalyst loading was all ca. 5.0 mg cm<sup>-2</sup>.

### 3. Material Characterization

The X-ray diffraction (XRD) patterns were recorded on the Shimadzu XRD-6000 diffractometer with Cu-K $\alpha$  radiation ( $\lambda=0.15418$  nm, 30 mA, 40 kV) as the source in the  $2\theta$  scanning range of 3-80°, at a scanning speed of 10°/min. The morphology of the samples was analyzed by scanning electron microscope (SEM) on Hitachi S-3500N operating at 20 kV. Transmission electron microscope (HRTEM) images were obtained on JEM 2010 instrument operating at 200 kV. The Raman spectra were obtained with a Jobin Yvon Horiba Raman spectrometer model HR800 using a 532 nm line of Ar<sup>+</sup> ion laser as the excitation source at room temperature. X-ray photoelectron spectroscopy (XPS) results was recorded on the Vgescalab-250 (Al K $\alpha$  radiator). The content of metal components was determined by inductively coupled plasma (ICP) emission spectroscopy on a Shimadzu ICPS-7500 instrument.

### 4. Electrochemical characterization

The electrochemical experiments involved in this study were carried out at room temperature using CHI660D electrochemical workstation (ChenHua Instruments, Shanghai, China) in 1M KOH aqueous solution as electrolyte. OER and HER measurements were conducted in the three electrodes. Using the as-prepared catalysts, the saturated Hg/HgO electrode as the working electrode (the submerged area is  $1 \times 1$  cm<sup>2</sup>) and reference electrode, respectively. The counter electrode of OER and HER are the platinum plate (the area is  $1 \times 1$  cm<sup>2</sup>) and graphite rod (to eliminate the influence of platinum plate on HER), respectively. A two-electrode cell was used on the same workstation for overall water splitting test, in which the electrocatalyst was directly used as anode and cathode at the same time. And the electrolyte

must be degassed by bubbling N<sub>2</sub> for at least 20 min before all the electrochemical experiments. We activated the electrocatalysts with 50 mV s<sup>-1</sup> through CV (from 0 to 0.8 V versus saturated Hg/HgO in OER, from -0.8 to -1.9 versus saturated Hg/HgO in HER) cycles until it reached a steady state after 40 cycles. According to the Nernst equation (Eq. (S1)), all the measured potentials of electrocatalysts were converted to a reversible hydrogen electrode (RHE).

$$E_{\text{RHE}} = E_{\text{Hg}/\text{HgO}} + 0.098 + 0.0592 \times \text{pH} \quad (\text{S1})$$

The electrocatalytic activity of all the catalysts were measured using liner sweep voltammetry (LSV) at 5 mV s<sup>-1</sup>. And all the polarization curves acquired were corrected with 90% iR compensation (i and R are the test current and compensation resistance between the reference electrode and the working electrode, respectively). The overpotentials ( $\eta$ ) were obtained by the equation (Eq. (S2)):

$$\eta = E_{\text{vs.RHE}} - 1.23 \quad (\text{S2})$$

Derived the Tafel slopes according to the polarization curve and fitted according to the Tafel equation (Eq. (S3)):

$$\eta = a + b \log j \quad (\text{S3})$$

where a represents a constant, b represents the Tafel slope, and j represents the measured current density. The double-layer capacitance ( $C_{\text{dl}}$ ) was evaluated by cyclic voltammetry (CV) in 0.2-0.3 V versus saturated Hg/HgO electrode at scanning rates of 10, 20, 30, 40 and 50 mV s<sup>-1</sup>, respectively. The long-term stability of electrocatalysts were evaluated through the chronoamperometry measurement. Electrochemical impedance spectroscopy (EIS) of 10 kHz to 0.01 Hz was measured at an applied voltage of 10 mV.

The TOF values of the Ni<sub>2</sub>Fe<sub>1</sub>-LDH/rGO/NF as OER and HER catalysts was calculated

according to the equations (Eq. (S4) and Eq. (S5)):

$$\text{For OER: TOF} = \frac{J \times A}{4 \times F \times m} \quad (\text{S4})$$

$$\text{For HER: TOF} = \frac{J \times A}{2 \times F \times m} \quad (\text{S5})$$

where  $j$  is the current density at overpotential of 0.3 V in  $\text{A cm}^{-2}$ ,  $A$  is surface area of the working electrode ( $1 \text{ cm}^2$ ),  $F$  is the faraday constant (a value of  $96485 \text{ C mol}^{-1}$ ) and  $m$  is concentration of active sites in the catalyst ( $\text{mol cm}^{-2}$ ).

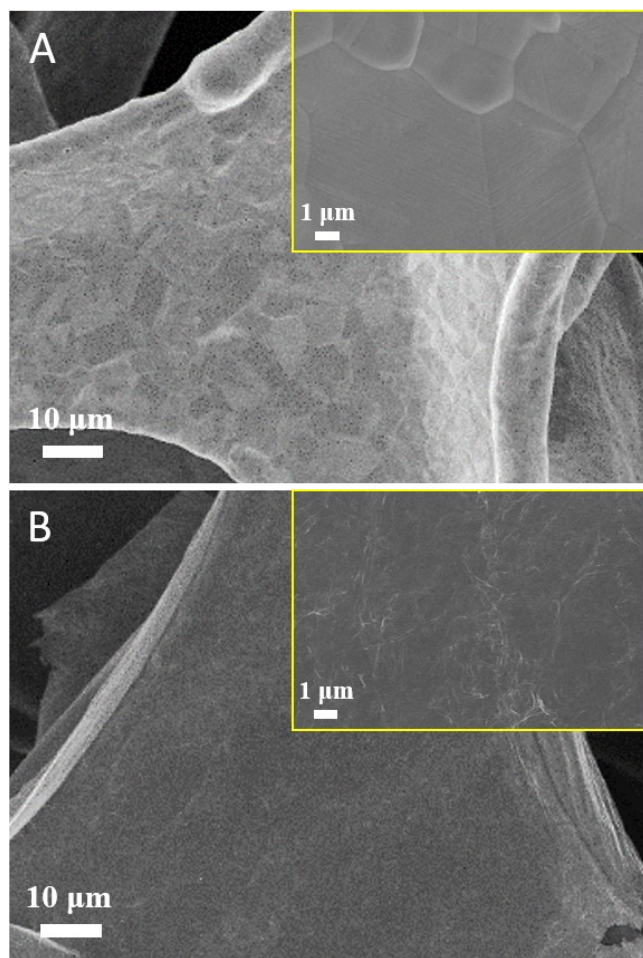

**Fig. S1** SEM images of (A) NF and (B) rGO/NF.

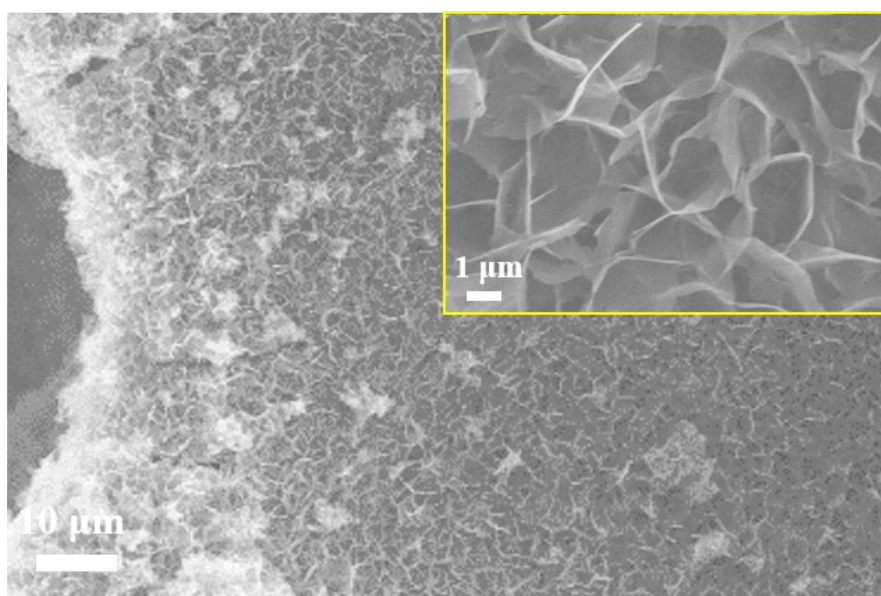

**Fig. S2** SEM image of Ni<sub>2</sub>Fe<sub>1</sub>-LDH/NF.

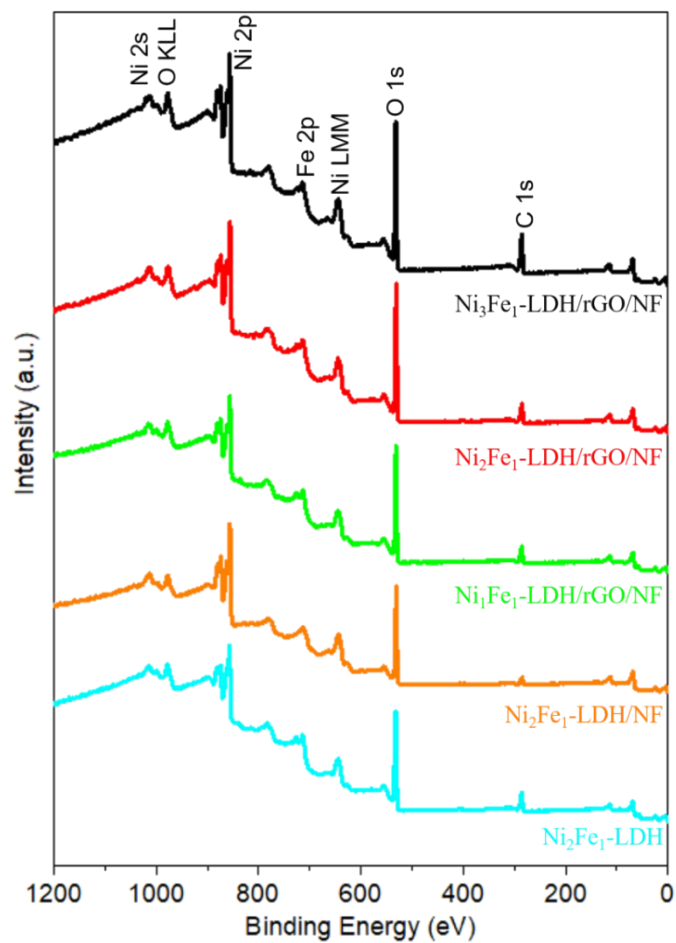

**Fig. S3** Full XPS survey spectrums of  $\text{Ni}_x\text{Fe}_1\text{-LDH/rGO/NF}$  ( $x=3, 2, 1$ ),  $\text{Ni}_2\text{Fe}_1\text{-LDH/NF}$  and  $\text{Ni}_2\text{Fe}_1\text{-LDH}$ .

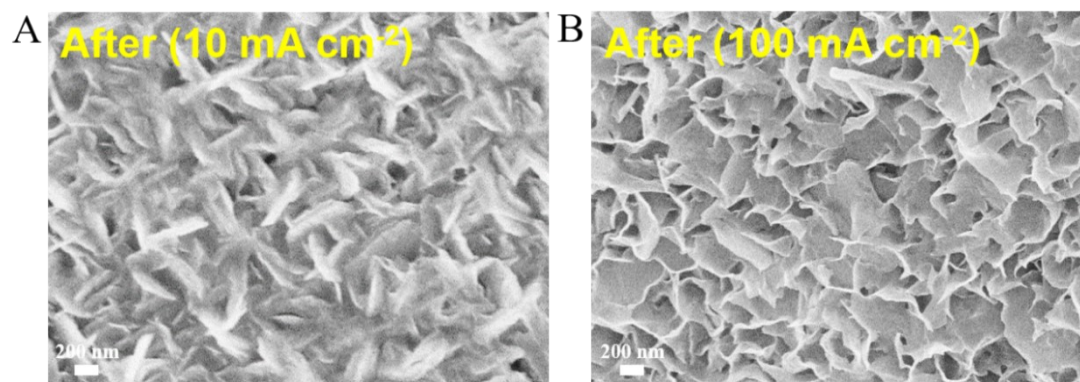

**Fig. S4** (A, B) SEM images of  $\text{Ni}_2\text{Fe}_1\text{-LDH/rGO/NF}$  after the 24 h OER chronoamperometry measurement.



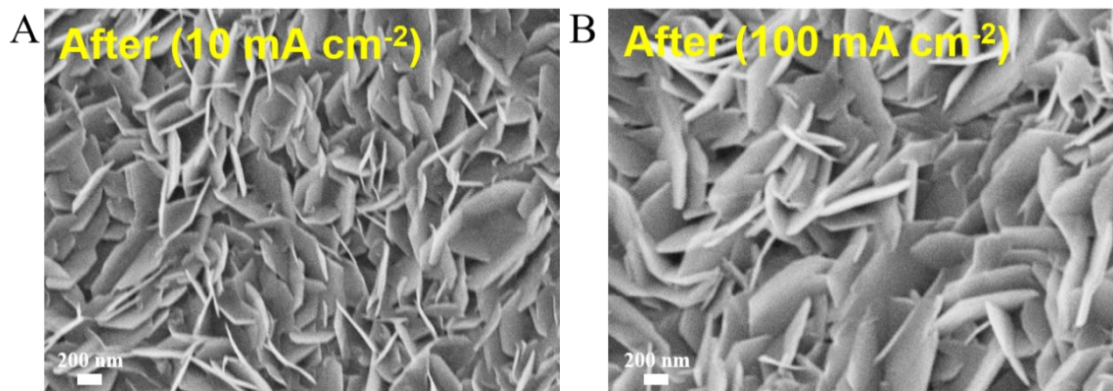

**Fig. S5** (A, B) SEM images of  $\text{Ni}_2\text{Fe}_1\text{-LDH/rGO/NF}$  after the 24 h HER chronoamperometry measurement.

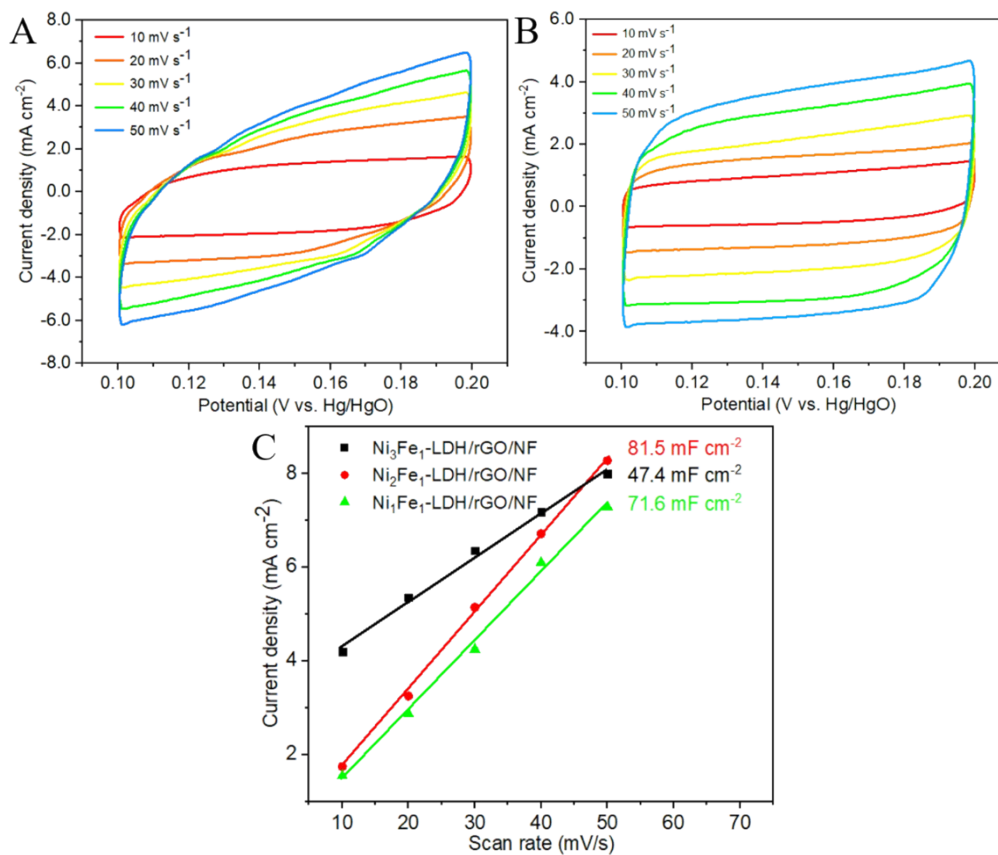

**Fig. S6** Cyclic voltammograms in the region of 0.2-0.3 V vs Hg/HgO of (A)  $\text{Ni}_3\text{Fe}_1\text{-LDH/rGO/NF}$  and (B)  $\text{Ni}_2\text{Fe}_1\text{-LDH/rGO/NF}$  at various scan rates. (C) The capacitive current densities of  $\text{Ni}_x\text{Fe}_1\text{-LDH/rGO/NF}$  ( $x=3, 2, 1$ ) plotted against different scan rates (10, 20, 30, 40, 50  $\text{mV s}^{-1}$ ).

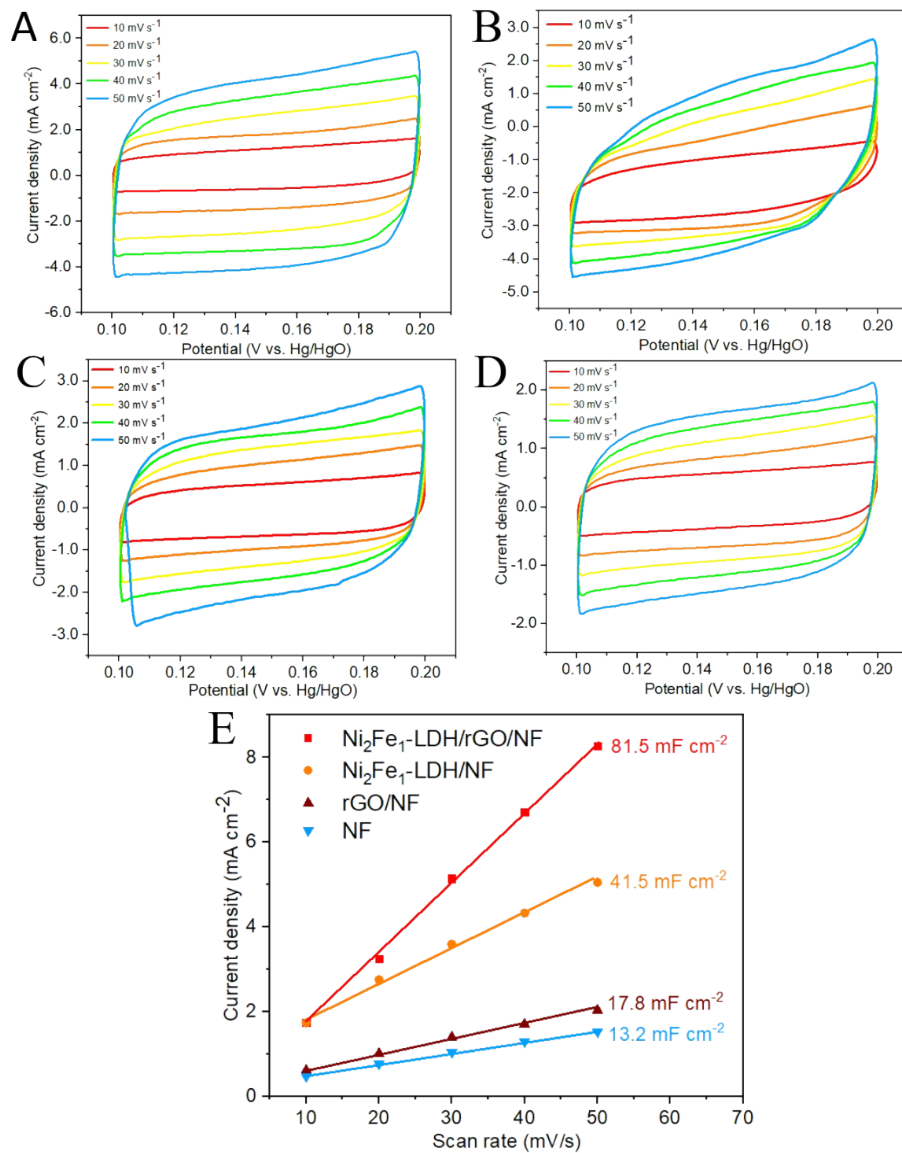

**Fig. S7** (A-D) Cyclic voltammetry curves of Ni<sub>2</sub>Fe<sub>1</sub>-LDH/rGO/NF, Ni<sub>2</sub>Fe<sub>1</sub>-LDH/NF, rGO/NF and bare NF at various scan rates in the region of 0.2-0.3 V vs Hg/HgO. (E) The capacitive current densities of Ni<sub>2</sub>Fe<sub>1</sub>-LDH/rGO/NF and control samples Ni<sub>2</sub>Fe<sub>1</sub>-LDH/NF, rGO/NF and bare NF plotted against different scan rates (10, 20, 30, 40, 50 mV s<sup>-1</sup>).

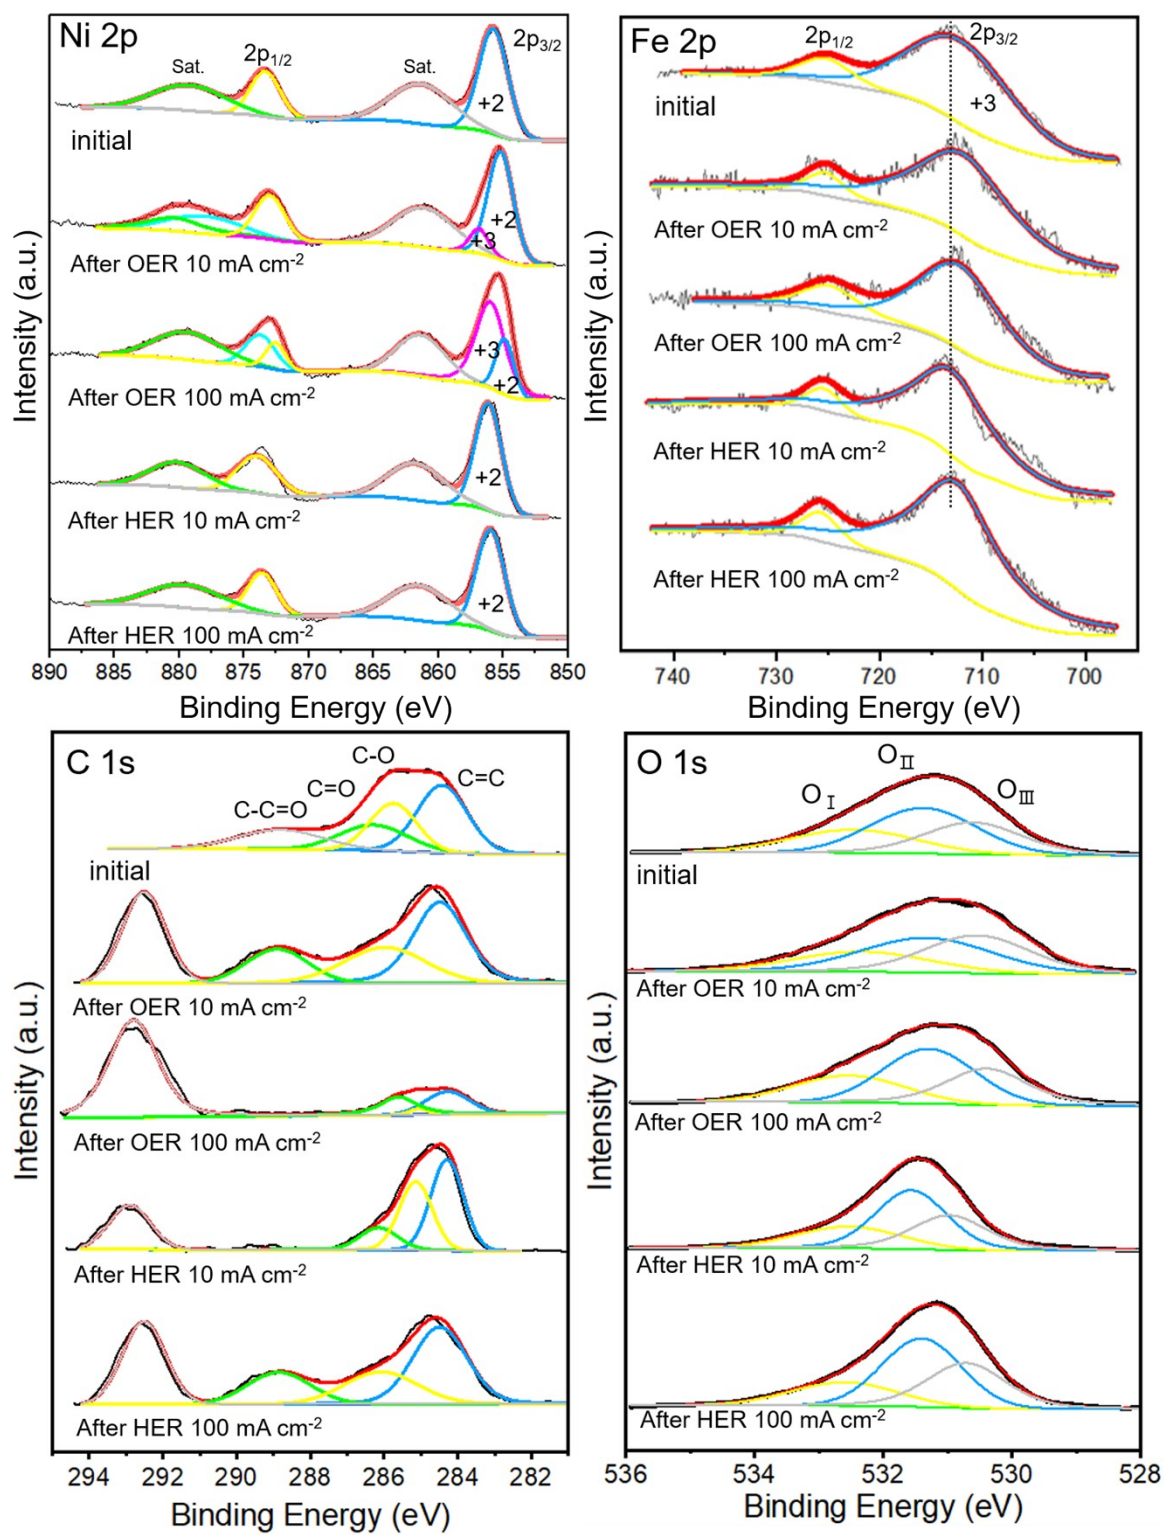

**Fig. S8** Ni 2p, Fe 2p, C 1s and O 1s XPS spectrums of Ni<sub>2</sub>Fe<sub>1</sub>-LDH/rGO/NF before and after the chronoamperometry measurement.

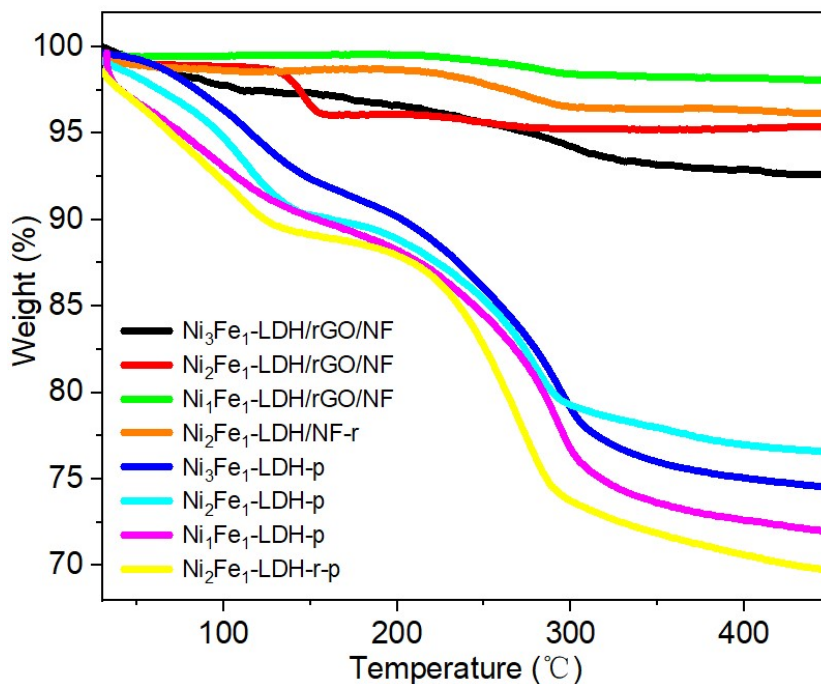

**Fig. S9** TGA plots of Ni<sub>x</sub>Fe<sub>1</sub>-LDH/rGO/NF (x=3, 2, 1), Ni<sub>2</sub>Fe<sub>1</sub>-LDH/NF and the respective LDH. The "r" suffix stands for the reference sample and the "p" suffix stands for the scraped down powder material.

The way to calculate the mass loading: Assuming the mass of Ni<sub>3</sub>Fe<sub>1</sub>-LDH/rGO/NF is x, and the weight loss ratios of Ni<sub>3</sub>Fe<sub>1</sub>-LDH/rGO/NF and Ni<sub>3</sub>Fe<sub>1</sub>-LDH-p are y% and z%, respectively, the loading capacity of Ni<sub>3</sub>Fe<sub>1</sub>-LDH/rGO/NF is  $x \cdot y/z$ . The calculation methods of Ni<sub>2</sub>Fe<sub>1</sub>-LDH/rGO/NF, Ni<sub>1</sub>Fe<sub>1</sub>-LDH/rGO/NF and Ni<sub>2</sub>Fe<sub>1</sub>-LDH/NF-r are the same. The mass loading of electrocatalyst on the rGO/NF of Ni<sub>x</sub>Fe<sub>1</sub>-LDH/rGO/NF (x=3, 2, 1) composites and control sample Ni<sub>2</sub>Fe<sub>1</sub>-LDH/NF are 6.21, 5.19, 5.86 and 4.14 mg cm<sup>-2</sup>, respectively.

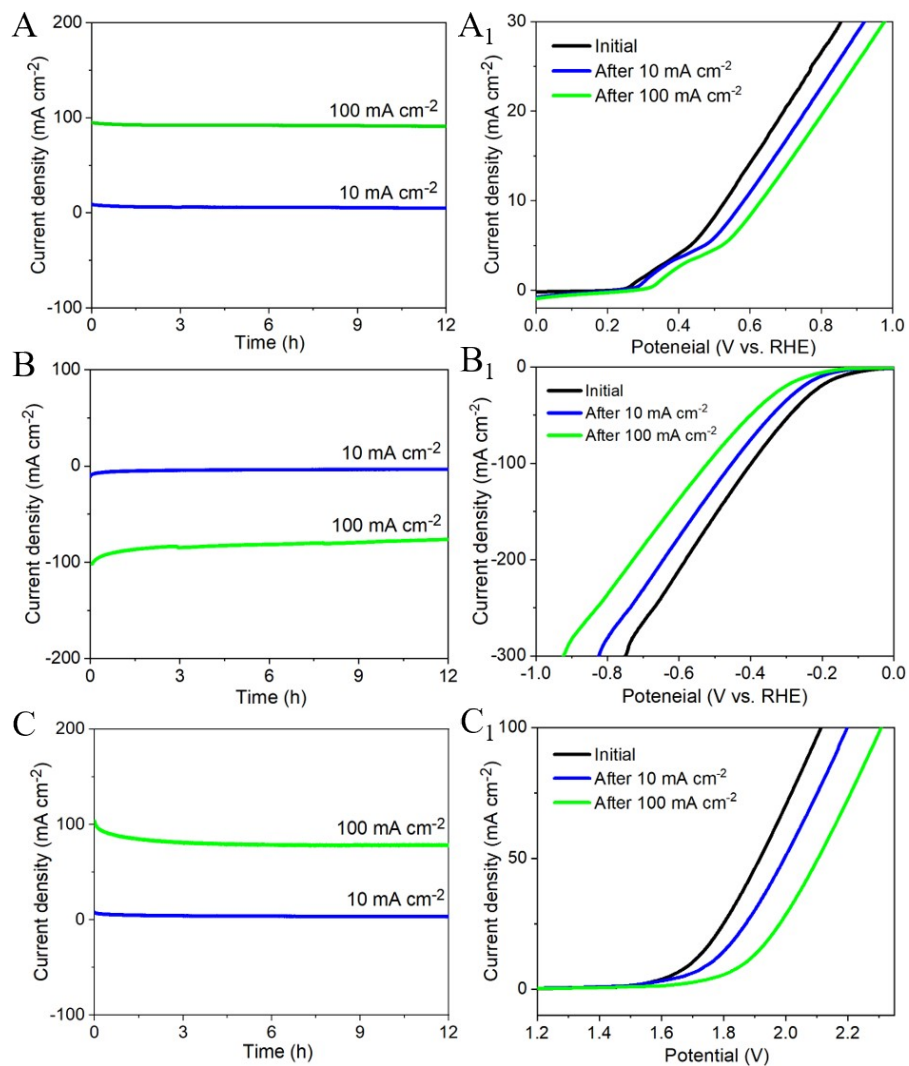

**Fig. S10** Chronoamperometry measurements of Ni<sub>2</sub>Fe<sub>1</sub>-LDH/NF composite for 12 h at 10 and 100 mA cm<sup>-2</sup> for OER (A), HER (B) and overall water splitting (C) and corresponding performance comparisons before and after the test 1M KOH (A<sub>1</sub>, B<sub>1</sub> and C<sub>1</sub>).

**Table S1** XRD parameters of Ni<sub>x</sub>Fe<sub>1</sub>-LDH/rGO/NF (x=3, 2, 1) composites and control sample Ni<sub>2</sub>Fe<sub>1</sub>-LDH/NF.

| Samples                                     | d <sub>003</sub> (nm) | d <sub>110</sub> (nm) | c(nm) <sup>a</sup> | a(nm) <sup>a</sup> | D <sub>003</sub> (nm) <sup>b</sup> | D <sub>110</sub> (nm) <sup>b</sup> |
|---------------------------------------------|-----------------------|-----------------------|--------------------|--------------------|------------------------------------|------------------------------------|
| Ni <sub>3</sub> Fe <sub>1</sub> -LDH/rGO/NF | 0.7815                | 0.1550                | 2.3445             | 0.3100             | 10.30                              | 21.63                              |
| Ni <sub>2</sub> Fe <sub>1</sub> -LDH/rGO/NF | 0.7859                | 0.1551                | 2.3876             | 0.3101             | 13.44                              | 24.75                              |
| Ni <sub>1</sub> Fe <sub>1</sub> -LDH/rGO/NF | 0.7901                | 0.1546                | 2.3702             | 0.3092             | 15.31                              | 29.74                              |
| Ni <sub>2</sub> Fe <sub>1</sub> -LDH/NF     | 0.7929                | 0.1548                | 2.3787             | 0.3095             | 14.21                              | 24.91                              |

<sup>a</sup> Based on the hexagonal system,  $a=2d_{110}$ ,  $c=3d_{003}$ ;

<sup>b</sup> Based on the Scherer formula  $D_{(hkl)}=k\lambda/\beta(\cos\theta)$  ( $k=0.89$ ;  $\lambda$  is the X-ray wavelength, Cu  $\alpha$ : 0.15418 nm;  $\beta$  is the half-height width of the diffraction peak (radians);  $\theta$  is the Bragg diffraction angle in degree).

**Table S2** EIS fitting parameters from equivalent circuits of all electrocatalysts during OER process.

| Electrocatalysts                            | Impedimetric parameters (1M KOH) |                                      |                                                       |       |                                      |                                                       |       |                                       |
|---------------------------------------------|----------------------------------|--------------------------------------|-------------------------------------------------------|-------|--------------------------------------|-------------------------------------------------------|-------|---------------------------------------|
|                                             | L (H cm <sup>-2</sup> )          | R <sub>s</sub> (Ω cm <sup>-2</sup> ) | Q-Y <sub>o</sub> (S s <sup>n</sup> cm <sup>-2</sup> ) | Q-n   | R <sub>f</sub> (Ω cm <sup>-2</sup> ) | Q-Y <sub>o</sub> (S s <sup>n</sup> cm <sup>-2</sup> ) | Q-n   | R <sub>ct</sub> (Ω cm <sup>-2</sup> ) |
| Ni <sub>3</sub> Fe <sub>1</sub> -LDH/rGO/NF | 9.137*10 <sup>-6</sup>           | 1.463                                | 0.053                                                 | 0.216 | 1.571                                | 0.131                                                 | 0.832 | 16.3                                  |
| Ni <sub>2</sub> Fe <sub>1</sub> -LDH/rGO/NF | 9.222*10 <sup>-7</sup>           | 1.307                                | 0.189                                                 | 0.531 | 1.659                                | 0.089                                                 | 0.512 | 7.51                                  |
| Ni <sub>1</sub> Fe <sub>1</sub> -LDH/rGO/NF | 8.937*10 <sup>-7</sup>           | 1.325                                | 0.568                                                 | 0.713 | 1.366                                | 0.235                                                 | 0.463 | 11.5                                  |
| Ni <sub>2</sub> Fe <sub>1</sub> -LDH/NF     | 8.723*10 <sup>-6</sup>           | 1.899                                | 1.468                                                 | 0.331 | 21.53                                | 0.527                                                 | 0.639 | 18.5                                  |
| rGO/NF                                      | 9.453*10 <sup>-6</sup>           | 2.264                                | 0.039                                                 | 0.213 | 0.311                                | 0.973                                                 | 0.723 | 23.1                                  |
| NF                                          | 9.659*10 <sup>-7</sup>           | 2.563                                | 0.431                                                 | 0.967 | 2.796                                | 0.032                                                 | 0.763 | 26.3                                  |

**Table S3** Comparison of the electrocatalytic OER activity of Ni<sub>x</sub>Fe<sub>1-x</sub>-LDH/rGO/NF (x=3, 2, 1) composites with other representative non-noble-metal OER electrocatalysts in basic solution recently reported in the literatures ( $\eta_{10}$ : overpotential at 10 mA cm<sup>-2</sup>).

| Electrocatalyst                             | Substrate      | Method                                   | $\eta_{10}$<br>(mV) | Tafel<br>Slope<br>(mV<br>dec <sup>-1</sup> ) | Stability<br>(h) | Reference |
|---------------------------------------------|----------------|------------------------------------------|---------------------|----------------------------------------------|------------------|-----------|
| Ni <sub>3</sub> Fe <sub>1</sub> -LDH/rGO/NF | Ni foam        | hydrothermal                             | 256                 | 55                                           | /                | This work |
| Ni <sub>2</sub> Fe <sub>1</sub> -LDH/rGO/NF |                |                                          | 228                 | 37                                           | 24               |           |
| Ni <sub>1</sub> Fe <sub>1</sub> -LDH/rGO/NF |                |                                          | 244                 | 47                                           | /                |           |
| NiFe-LDH/graphene/Ni foam                   | Ni foam        | CVD, hydrothermal                        | 325                 | 44                                           | 2.22             | [5]       |
| NiFe-LDH/RGO/NF                             | Ni foam        | chemical reduction,<br>electrodeposition | 150                 | 35                                           | 10               | [6]       |
| NiFe-LDH/rGO@NF                             | Ni foam        | hydrothermal                             | 277@<br>$\eta_{50}$ | 59.9                                         | 24               | [7]       |
| NiFe LDH/rGO                                | glassy carbon  | solvothermal                             | 250                 | 33                                           | 1.11             | [8]       |
| NiFe-LDH/3D-ErGO                            | Au-RDE         | electrodeposition                        | 259                 | 39                                           | 2                | [9]       |
| NiFe-LDH/NrGO                               | Ni foam        | solvothermal                             | 258                 | 63                                           | 9                | [10]      |
| 0.8 GO-FeNi-LDH                             | Ni foam        | electrodeposition                        | 285                 | 33                                           | 25               | [11]      |
| NiFe LDH/CNT                                | glassy carbon  | solvothermal                             | 247                 | 31                                           | 2                | [12]      |
| NiFe LDH-UF                                 | graphite paper | coprecipitation and ultrasonication      | 254                 | 32                                           | 12               | [13]      |
| Flower-like Ni-Fe LDH                       | glassy carbon  | hydrothermal                             | 344                 | 97                                           | 11               | [14]      |
| Exfoliated NiFe NS                          | glassy carbon  | hydrothermal                             | 302                 | 40                                           | 12               | [15]      |
| NiFeCo LDH/NF                               | Ni foam        | electrodeposition                        | 210                 | 39                                           | 50               | [16]      |
| Ni <sub>2.5</sub> Co <sub>0.5</sub> Fe/NF   | Ni foam        | electrodeposition                        | 275                 | 99                                           | 2.8              | [17]      |
| NiFeRu LDH/NF                               | Ni foam        | hydrothermal                             | 225                 | 32                                           | 10               | [18]      |
| Ni <sub>3</sub> S <sub>2</sub> @NGCLs/NF    | Ni foam        | CVD                                      | 271                 | 99                                           | 40               | [19]      |



**Table S4** EIS fitting parameters from equivalent circuits of all electrocatalysts during HER process.

| Electrocatalysts                            | Impedimetric parameters (1M KOH) |                                      |                                                       |      |                                       |
|---------------------------------------------|----------------------------------|--------------------------------------|-------------------------------------------------------|------|---------------------------------------|
|                                             | L (H cm <sup>-2</sup> )          | R <sub>s</sub> (Ω cm <sup>-2</sup> ) | Q-Y <sub>o</sub> (S s <sup>n</sup> cm <sup>-2</sup> ) | Q-n  | R <sub>ct</sub> (Ω cm <sup>-2</sup> ) |
| Ni <sub>3</sub> Fe <sub>1</sub> -LDH/rGO/NF | 7.261*10 <sup>-7</sup>           | 1.49                                 | 0.0815                                                | 0.82 | 26.8                                  |
| Ni <sub>2</sub> Fe <sub>1</sub> -LDH/rGO/NF | 6.662*10 <sup>-8</sup>           | 1.52                                 | 0.0617                                                | 0.80 | 7.63                                  |
| Ni <sub>1</sub> Fe <sub>1</sub> -LDH/rGO/NF | 8.176*10 <sup>-7</sup>           | 1.66                                 | 0.0352                                                | 0.78 | 16.1                                  |
| Ni <sub>2</sub> Fe <sub>1</sub> -LDH/NF     | 9.265*10 <sup>-7</sup>           | 1.76                                 | 0.2943                                                | 0.80 | 37.7                                  |
| rGO/NF                                      | 9.643*10 <sup>-8</sup>           | 1.59                                 | 0.0873                                                | 0.82 | 46.7                                  |
| NF                                          | 9.013*10 <sup>-7</sup>           | 1.93                                 | 0.1126                                                | 0.81 | 52.9                                  |

**Table S5** Comparison of the electrocatalytic HER activity of Ni<sub>x</sub>Fe<sub>1</sub>-LDH/rGO/NF (x=3, 2, 1) composites with other representative non-noble-metal HER electrocatalysts in basic solution recently reported in the literatures ( $\eta_{10}$ : overpotential at 10 mA cm<sup>-2</sup>).

| Electrocatalyst                               | Substrate        | Method            | $\eta_{10}$<br>(mV) | Tafel Slope<br>(mV dec <sup>-1</sup> ) | Stability<br>(h) | Reference |
|-----------------------------------------------|------------------|-------------------|---------------------|----------------------------------------|------------------|-----------|
| Ni <sub>3</sub> Fe <sub>1</sub> -LDH/rGO/NF   | Ni foam          | hydrothermal      | 131                 | 143                                    | /                | This work |
| Ni <sub>2</sub> Fe <sub>1</sub> -LDH/rGO/NF   |                  |                   | 109                 | 121                                    | 24               |           |
| Ni <sub>1</sub> Fe <sub>1</sub> -LDH/rGO/NF   |                  |                   | 117                 | 130                                    | /                |           |
| 0.8 GO-FeNi-LDH                               | Ni foam          | electrodeposition | 119                 | 36                                     | 25               | [11]      |
| NiFe LDH/NF                                   | Ni foam          | hydrothermal      | 210                 | 59                                     | 3                | [20]      |
| NiFe <sub>2</sub> O <sub>4</sub> /NiFe LDH/NF | Ni foam          | hydrothermal      | 101                 | 67                                     | 20               | [21]      |
| NiFe LDH/NiCo <sub>2</sub> O <sub>4</sub> /NF | Ni foam          | hydrothermal      | 192                 | 59                                     | 10               | [22]      |
| NiFe LDH@NiCoP/NF                             | Ni foam          | hydrothermal      | 120                 | 88                                     | 100              | [23]      |
| NiFe/NiCo <sub>2</sub> O <sub>4</sub> /NF     | Ni foam          | hydrothermal      | 105                 | 39                                     | 10               | [24]      |
| EG/Co <sub>0.85</sub> Se/NiFe LDH             | graphite<br>foil | hydrothermal      | 260                 | 125                                    | 10               | [25]      |
| NiCo <sub>2</sub> S <sub>4</sub> @NiFe LDH/NF | Ni foam          | hydrothermal      | 200                 | 101                                    | 12               | [26]      |

**Table S6** Comparison of O 1s XPS of Ni<sub>2</sub>Fe<sub>1</sub>-LDH/rGO/NF before and after the chronoamperometry measurement.

| Ni <sub>2</sub> Fe <sub>1</sub> -LDH/rGO/NF | O 1s (eV)       |                 |                  |
|---------------------------------------------|-----------------|-----------------|------------------|
|                                             | O <sub>I</sub>  | O <sub>II</sub> | O <sub>III</sub> |
| Initial                                     | 532.33 (19.23%) | 531.22 (44.94%) | 530.75 (35.83%)  |
| After OER (10 mA cm <sup>-2</sup> )         | 532.33 (22.80%) | 531.32 (40.22%) | 530.54 (36.98%)  |
| After OER (100 mA cm <sup>-2</sup> )        | 532.52 (25.60%) | 531.28 (43.63%) | 530.39 (30.77%)  |
| After HER (10 mA cm <sup>-2</sup> )         | 532.53 (23.04%) | 531.56 (46.13%) | 530.96 (30.84%)  |
| After HER (100 mA cm <sup>-2</sup> )        | 532.59 (25.60%) | 531.39 (43.63%) | 530.70 (30.77%)  |

**Table S7** Comparison of Ni<sub>2</sub>Fe<sub>1</sub>-LDH/rGO/NF with previously reported bifunctional electrocatalysts for overall water splitting in 1 M KOH.

| Electrocatalyst                              | Method                          | Substrate     | Current density/mA cm <sup>-2</sup> | Cell voltage | Stability (h) | Reference |
|----------------------------------------------|---------------------------------|---------------|-------------------------------------|--------------|---------------|-----------|
| Ni <sub>2</sub> Fe <sub>1</sub> -LDH/rGO/NF  | hydrothermal                    | Ni foam       | 10                                  | 1.62         | 24            | This work |
| NiCoFeB                                      | chemical reduction              | glassy carbon | 10                                  | 1.81         | 20            | [27]      |
| FeCoNi/NG                                    | annealing                       | rotating disk | 10                                  | 1.69         | 10            | [28]      |
| NiFe/NiCo <sub>2</sub> O <sub>4</sub> /NF    | hydrothermal, electrodeposition | Ni foam       | 10                                  | 1.67         | 10            | [24]      |
| CoFe/NF                                      | electrodeposition               | Ni foam       | 10                                  | 1.64         | 50            | [29]      |
| Ni <sub>0.5</sub> Co <sub>0.5</sub> /NC film | reactive PLD deposition         | NC film       | 10                                  | 1.75         | 5             | [30]      |
| Ni <sub>3</sub> Se <sub>2</sub>              | electrodeposition               | Cu foam       | 10                                  | 1.65         | 12            | [31]      |
| Co-P-B-5                                     | chemical reduction              | glassy carbon | 10                                  | 1.65         | /             | [32]      |
| Mo-Co <sub>9</sub> S <sub>8</sub> @C         | solvothermal                    | carbon cloth  | 10                                  | 1.68         | 24            | [33]      |

## References

1. X. Xu, H. Chu, Z. Zhang, P. Dong, R. Baines, P. Ajayan, J. Shen and M. Ye, *ACS Appl. Mater. Interfaces*, 2017, **9**, 32756-32766.
2. L. Dou, T. Fan and H. Zhang, *Catal. Sci. Technol.*, 2015, **5**, 5153-5167.
3. L. Dou and H. Zhang, *J. Mater. Chem. A.*, 2016, **4**, 18990-19002.
4. J. Li, Y. Song, Y. Wang and H. Zhang, *ACS Appl. Mater. Interfaces*, 2020, **12**, 50365-50376.
5. H. Wang, C. Tang and Q. Zhang, *J. Mater. Chem. A.*, 2015, **3**, 16183-16189.
6. C. Li, J. Chen, Y. Wu, W. Cao, S. Sang, Q. Wu, H. Liu and K. Liu, *Int. J. Hydrogen Energy*, 2019, **44**, 2656-2663.
7. J. Chen, C. Liu, W. Ren, J. Sun, Y. Zhang and L. Zou, *J. Alloys Compd.*, 2022, **901**, 163510.
8. D. Xia, L. Zhou, S. Qiao, Y. Zhang, D. Tang, J. Liu, H. Huang, Y. Liu and Z. Kang, *Mater. Res. Bull.*, 2016, **74**, 441-446.
9. X. Yu, M. Zhang, W. Yuan and G. Shi, *J. Mater. Chem. A.*, 2015, **3**, 6921-6928.
10. T. Zhan, X. Liu, S. Lu and W. Hou, *Appl. Catal. B: Environ.*, 2017, **205**, 551-558.
11. X. Han, N. Suo, C. Chen, Z. Lin, Z. Dou, X. He and L. Cui, *Int. J. Hydrogen Energy*, 2019, **44**, 29876-29888.
12. M. Gong, Y. Li, H. Wang, Y. Liang, J. Wu, J. Zhou, J. Wang, T. Regier, F. Wei and H. Dai, *J. Am. Chem. Soc.*, 2013, **135**, 8452-8455.
13. Y. Zhao, X. Zhang, X. Jia, G. Waterhouse, R. Shi, X. Zhang, F. Zhan, Y. Tao, L. Wu, C. Tung, D. O'Hare and T. Zhang, *Adv. Energy Mater.*, 2018, **8**, 1703585.
14. L. Zhou, X. Huang, H. Chen, P. Jin, G. Li and X. Zou, *Dalton Trans.*, 2015, **44**, 11592-11600.
15. F. Song and X. Hu, *Nat. Commun.*, 2014, **5**, 4477.
16. P. Babar, A. Lokhande, V. Karade, B. Pawar, M. Gang, S. Pawar and J. Kim, *ACS Sustain. Chem. Eng.*, 2019, **7**, 10035-10043.
17. X. Zhu, C. Tang, H. Wang, B. Li, Q. Zhang, C. Li, C. Yang and F. Wei, *J. Mater. Chem. A.*, 2016, **4**, 7245-7250.
18. G. Chen, T. Wang, J. Zhang, P. Liu, H. Sun, X. Zhuang, M. Chen and X. Feng, *Adv. Mater.*, 2018, **30**, 1706279.
19. B. Li, Z. Li, Q. Pang and J. Zhang, *Chem. Eng. J.*, 2020, **401**, 126045.
20. J. Luo, J. Im, M. Mayer, M. Schreier, M. Nazeeruddin, N. Park, S. Tilley, H. Fan and M. Graetzel, *Science*, 2014, **345**, 1593-1596.
21. Z. Wu, Z. Zou, J. Huang and F. Gao, *ACS Appl. Mater. Interfaces*, 2018, **10**, 26283-26292.
22. Z. Wang, S. Zeng, W. Liu, X. Wang, Q. Li, Z. Zhao and F. Geng, *ACS Appl. Mater. Interfaces*, 2017, **9**, 1488-1495.
23. H. Zhang, X. Li, A. Hähnel, V. Naumann, C. Lin, S. Azimi, S. Schweizer, A. W. Maijenburg and R. Wehrspohn, *Adv. Funct. Mater.*, 2018, **28**, 1706847.

24. C. Xiao, Y. Li, X. Lu and C. Zhao, *Adv. Funct. Mater.*, 2016, **26**, 3515-3523.
25. H. Yang, M. Lohe, Z. Jian, S. Liu and X. Feng, *Energy Environ. Sci.*, 2015, **9**, 478-483.
26. J. Liu, J. Wang, B. Zhang, Y. Ruan, L. Lv, X. Ji, K. Xu, L. Miao and J. Jiang, *ACS Appl. Mater. Interfaces*, 2017, **9**, 15364-15372.
27. Y. Li, B. Huang, Y. Sun, M. Luo, Y. Yang, Y. Qin, L. Wang, C. Li, F. Lv, W. Zhang and S. Guo, *Small*, 2019, **15**, 1804212.
28. Y. Yang, Z. Lin, S. Gao, J. Su, Z. Lun, G. Xia, J. Chen, R. Zhang and Q. Chen, *ACS Catal.*, 2017, **7**, 469-479.
29. P. Babar, A. Lokhande, H. Shin, B. Pawar, M. Gang, S. Pawar and J. Kim, *Small*, 2018, **14**, 1702568.
30. B. Bayatsarmadi, Y. Zheng, V. Russo, L. Ge, C. S. Casari and S.-Z. Qiao, *Nanoscale*, 2016, **8**, 18507-18515.
31. J. Shi, J. Hu, Y. Luo, X. Sun and A. Asiri, *Catal. Sci. Technol.*, 2015, **5**, 4954-4958.
32. A. Chunduri, S. Gupta, O. Bapat, A. Bhide, R. Fernandes, M. K. Patel, V. Bambole, A. Miotello and N. Patel, *Appl. Catal. B: Environ.*, 2019, **259**, 118051.
33. L. Wang, X. Duan, X. Liu, J. Gu, R. Si, Y. Qiu, Y. Qiu, D. Shi, F. Chen, X. Sun, J. Lin and J. Sun, *Adv. Energy Mater.*, 2020, **10**, 1903137.
